1 Title: Development and Evaluation of Machine Learning Models for the Detection of Emergency

2 Department Patients with Opioid Misuse from Clinical Notes

3

4 Authors: Usman Shahid<sup>1,2</sup>, Natalie Parde<sup>1,2</sup>, Dale L. Smith<sup>1,3</sup>, Grayson Dickinson<sup>4</sup>, Joseph

5 Bianco<sup>5</sup>, Dillon Thorpe<sup>1,3</sup>, Madhav Hota<sup>6</sup>, Majid Afshar<sup>7</sup>, Niranjan S. Karnik<sup>1,3,8</sup>, Neeraj

6 Chhabra<sup>1,8,9\*</sup>

7

8 1. AI.Health4All Center for Health Equity using Machine Learning and Artificial Intelligence,

9 College of Medicine, University of Illinois Chicago, Chicago, IL, USA

10 2. Natural Language Processing Laboratory, Department of Computer Science, University

11 of Illinois Chicago, Chicago, IL USA

12 3. Department of Psychiatry, University of Illinois Chicago, Chicago, IL USA

13 4. William Carey University, College of Osteopathic Medicine, Hattiesburg, MS,

14 USA

15 5. University of Illinois College of Medicine, Chicago, IL USA

16 6. University of Missouri-Kansas City, Kansas City, MO, USA

17 7. Department of Medicine, School of Medicine and Public Health, University of Wisconsin

18 Madison, Madison, WI, USA

19 8. Institute for Research on Addictions, University of Illinois Chicago, Chicago, IL USA

20 9. Department of Emergency Medicine, University of Illinois Chicago, Chicago, IL

21 USA

22

23 Corresponding Author: Neeraj Chhabra, MD, MSCR. Department of Emergency

24 Medicine, University of Illinois Chicago. 808 S Wood Street, 4<sup>th</sup> floor, Chicago, IL 60612.

25 Neeraj1@uic.edu

26

27 Grants: This work was supported by the following grants from the National Institute on Drug  
28 Abuse (NIDA)/NIH: K23DA055061 (Chhabra), R01DA051464 (Afshar), R61DA057629  
29 (Karnik/Chhabra) and, in part, by the National Center for Advancing Translational Sciences  
30 (NCATS), through Grant UL1TR002003. The content is solely the responsibility of the authors  
31 and does not necessarily represent the official views of the National Institutes of Health.

32

33 Abstract

34

35 Objectives

36 The accurate identification of Emergency Department (ED) encounters involving opioid misuse  
37 is critical for health services, research, and surveillance. We sought to develop natural language  
38 processing (NLP)-based models for the detection of ED encounters involving opioid misuse.

39

40 Methods

41 A sample of ED encounters enriched for opioid misuse was manually annotated and clinical  
42 notes extracted. We evaluated classic machine learning (ML) methods, fine-tuning of publicly  
43 available pretrained language models, and a previously developed convolutional neural network  
44 opioid classifier for use on hospitalized patients (SMART-AI). Performance was compared to  
45 ICD-10-CM codes. Both raw text and text transformed to the United Medical Language System  
46 were evaluated. Face validity was evaluated by term feature importance.

47

48 Results

49 There were 1123 encounters used for training, validation, and testing. Of the classic ML  
50 methods, XGBoost had the highest AU\_PRC (0.936), accuracy (0.887), and F1 score (0.863)  
51 which outperformed ICD-10-CM codes [accuracy 0.870; F1 0.830]. Logistic regression, support

52 vector machine, and XGBoost models had higher AU\_PRC using transformed text, while  
53 decision trees performed better using raw text. Excluding XGBoost, fine-tuned pre-trained  
54 language models outperformed classic ML methods. The best performing model was the fine-  
55 tuned SMART-AI based model with domain adaptation [AU\_PRC 0.948; accuracy 0.882; F1  
56 0.851]. Explainability analyses showed the most predictive terms were 'heroin', 'opioids',  
57 'alcoholic intoxication, chronic', 'cocaine', 'opiates', and 'suboxone'.

58

## 59 Conclusions

60 NLP-based models outperform entry of ICD-10-CM diagnosis codes for the detection of ED  
61 encounters with opioid misuse. Fine tuning with domain adaptation for pre-trained language  
62 models resulted in improved performance.

63

64 Introduction

65

66 Drug overdose is the leading cause of accidental death in the United States with the majority  
67 involving an opioid.<sup>1</sup> A critical healthcare setting for the initiation of treatments and medications  
68 for opioid use disorder (OUD) is the Emergency Department (ED).<sup>2</sup> While treatments exist to  
69 decrease mortality related to opioid use, only a minority of patients with OUD are engaged in  
70 medical treatment.<sup>3,4</sup> As people with OUD disproportionately utilize emergency services, ED  
71 encounters serve as valuable opportunities for interventions and linkage to outpatient healthcare  
72 resources. The accurate identification of patients at risk for OUD in the ED setting is critical to  
73 providing these life-saving treatments.

74

75 Current methods to identify patients with opioid misuse, defined as taking an opioid in a manner  
76 other than prescribed or using illicit opioids, rely on clinical interactions and documentation,  
77 often in the form of diagnosis codes.<sup>5-8</sup> Universal manual screening for opioid misuse in the ED  
78 has been proposed but is highly resource-intensive and infrequently performed.<sup>5,9</sup> Prior work  
79 has shown that documentation of opioid misuse by International Classification of Diseases, 10<sup>th</sup>  
80 revision, Clinical Modification (ICD-10-CM-CM) diagnosis code is highly insensitive and fails in  
81 identifying a large proportion of patients that would benefit from interventions.<sup>10</sup> The low  
82 sensitivity of ICD-10-CM based approaches for patient identification has impacts on research,  
83 surveillance, resource allocation, and clinical services in the healthcare setting. Methods in  
84 natural language processing (NLP) and machine learning (ML) to process clinical notes for  
85 clinical workflows have shown promise to build tools for screening opioid misuse in the inpatient  
86 setting.<sup>11-13</sup> Such models rely on inpatient hospital documentation from the electronic health  
87 record (EHR), which far exceeds the amount of documentation performed during a typical ED  
88 encounter. It is currently unknown if NLP models trained using machine learning can be  
89 successfully domain adapted for screening opioid misuse in the ED setting.

90

91 The goal of the current study is to develop and evaluate NLP-based machine learning models to  
92 screen patients for opioid misuse during their ED encounter. We hypothesized that these  
93 models would outperform diagnosis codes in the identification of patients with opioid misuse,  
94 potentially highlighting the utility of such models for health services delivery, research, and  
95 surveillance.

96

97 Methods

98

99 Setting and Cohort Development

100 University of Illinois Hospital and Health Sciences System (UIHealth) is comprised of a 462-bed  
101 tertiary referral hospital with a 30-bed emergency department providing care across 45,000  
102 patient encounters annually. It is located on the westside of Chicago, Illinois within an urban  
103 area that has among the highest opioid-related mortality in the United States.<sup>14,15</sup> UIHealth has  
104 maintained Epic as its EHR vendor since 2020 with a clinical data warehouse (CDW) of all  
105 patient encounters and associated data. The retrospective observational cohort of ED  
106 encounters used for training and testing of classifier models was drawn from the notes and  
107 reports extracted from the CDW with inclusion criteria of age greater than or equal to 18 years  
108 and encounter origination in the ED. A train/validation/test corpus was developed using a  
109 sample of approximately 1200 ED encounters. The sample was enriched for suspected opioid  
110 misuse using previously described methods involving sampling ED encounters with a positive  
111 urine opiate screen without coexisting opioid prescription or medication administration on  
112 hospital intake or an opioid-related ICD-10-CM diagnostic code and matching with encounters  
113 lacking these criteria.<sup>10,16</sup> Enrichment was pursued to allow a balanced dataset for more efficient  
114 model training and improved classification. Encounters matching the criteria during the study  
115 period of September 2020 to March 2023 were identified and matched in a 1:1 ratio on

116 disposition status (hospital admission or discharge) with encounters lacking previously  
117 described criteria or additional criteria placing the patient at risk for opioid misuse: an ICD-10-  
118 CM code for a chronic pain diagnosis, an order for naloxone, or an order for a urine drug  
119 regardless of result. We matched on disposition in lieu of age and sex to minimize bias from  
120 increased documentation, testing, and entry of ICD-10-CM diagnosis codes based on admission  
121 status and because age and sex are potentially important predictor variables for opioid misuse.

122

### 123 Manual Annotation

124 The dataset was further processed with expert manual annotations. As opioid misuse  
125 represents a heterogeneous pattern of drug use and is difficult to categorize solely from  
126 variables within the EHR, potential cases and non-cases were manually annotated in a blinded  
127 format using a structured manual annotation schema. For the purposes of annotation, opioid  
128 misuse was defined as taking an opioid for reasons other than prescribed or as an illicit drug,  
129 consistent with definitions from the National Institute of Drug Abuse (NIDA) and the National  
130 Survey on Drug Use and Health (NSDUH).<sup>6-8</sup> Annotators underwent a one-hour online training  
131 session with an expert in emergency addictions care (NC). They were required to achieve an  
132 interrater reliability kappa of greater than 0.80 with the expert prior to independent annotation.  
133 Annotators again completed cases in parallel with the expert and were given additional cases to  
134 annotate only after achieving threshold interrater reliability following every 100 cases  
135 independently annotated. Case details were extracted from the EHR by the annotators into a  
136 structured REDCap data collection form for each encounter.<sup>17,18</sup>

137

138 Using previously described methods, the presence of opioid misuse was determined using a 5-  
139 point Likert scale indicating the probability of opioid misuse which included the categories of  
140 definite, highly probable, probable, definitely not, and uncertain.<sup>10,11</sup> Probable cases required  
141 either: 1) history of opioid misuse evident in clinical notes but no current documentation for the

142 encounter; 2) provider mention of drug-seeking behavior; or 3) evidence of other drug misuse,  
143 except alcohol, in addition to prescription opioid use. Highly probable cases had either more  
144 than one probable case criteria or provider mention of suspicion of opioid misuse. Definite cases  
145 were classified by either patient self-report of opioid misuse or documentation by provider of  
146 patient misusing an opioid. Cases lacking any of the above criteria were classified as 'definitely  
147 not.' For classification, cases annotated as probable, highly probable, or definite were  
148 categorized as exhibiting opioid misuse.

149

## 150 Model Development

151 Encounters comprising the cohort were sorted chronologically by encounter date and divided  
152 into training, validation, and testing sets at a ratio of 70/15/15. We evaluated multiple model  
153 architectures, all of which can be broadly categorized as either classic (feature-based) machine  
154 learning and neural methods. Classic machine learning methods included logistic regression,  
155 support vector machines, decision trees, and eXtreme Gradient Boosted (XGBoost) trees.  
156 Neural methods utilized publicly available pre-trained language models or a previously trained  
157 convolutional neural network opioid classifier for use on hospitalized patients (SMART-AI).<sup>13</sup> We  
158 experimented with two variants of the SMART-AI classifier. Firstly, we used the classifier as a  
159 feature extractor and trained an MLP classifier on these features. In the second variant, we  
160 fine-tuned this model end-to-end on our dataset to improve domain adaptation.<sup>19</sup> The pre-  
161 trained language models included Bidirectional Encoder Representations from Transformers  
162 (BERT), BioBERT, Longformer, Clinical Longformer, and Clinical BigBird. BERT is an encoder-  
163 only transformer model developed by Google and Longformer is a modified transformer model  
164 which can account for longer text sequences for use on general text.<sup>20,21</sup> BioBERT, Clinical  
165 Longformer, and Clinical BigBird are domain-adapted language models pre-trained on medical  
166 corpora.<sup>22,23</sup> For neural models, we performed domain adaptation with fine-tuning of the pre-  
167 trained model on the training data by using the averaged embeddings from the final hidden layer

168 of the pre-trained model and added a Multi-Layer Perceptron classifier on top with one hidden  
169 layer of size 256 and dropout layers with probability 0.3. Rectified Linear Unit (ReLU) was used  
170 as the activation function between intermediate layers and final probabilities were obtained  
171 using the sigmoid function, similar to the binary output provided by a logistic regression  
172 classifier.

173

#### 174 Text Processing

175 All clinical documents originating from individual ED encounters were concatenated in  
176 chronological order, including notes from staff with direct interaction with patients in the ED such  
177 as physicians and nurses. For each machine learning method, we evaluated both the use of raw  
178 text as well as transformed text (feature engineering), where applicable. For classic machine  
179 learning methods, text went through minimal preprocessing by converting to lower case and  
180 breaking the text into unigram (single word, top 10000 unigrams by frequency) feature vectors  
181 to represent individual variables. No feature engineering was performed for fine-tuning of pre-  
182 trained language models and the natural language of the text was used up to the context length  
183 of the language model (e.g., 512 for BERT based and 4096 for Longformer based models)

184

185 In addition to the raw text features, the text was also mapped to medical concepts and  
186 converted into structured codes, referred to as concept unique identifiers (CUIs). The text was  
187 mapped to the National Library of Medicine's Unified Medical Language System (UMLS)  
188 concept unique identifier (CUI) codes using the clinical Text And Knowledge Extraction System  
189 (cTAKES). cTAKES is an open-source NLP engine which identifies named entities in raw text  
190 and maps them to the UMLS.<sup>24,25</sup> This transformation accounts for negation and outputs CUI  
191 codes. An additional feature of cTAKES transformation is the stripping of protected health  
192 information from the raw text as part of processing into named entities and CUIs as well as  
193 bringing together semantically similar terms to the same medical concept using the UMLS



194 Metathesaurus (i.e, opioid use disorder and OUD). We chose to evaluate both raw and  
195 transformed text. This is because raw text retains the contextual information in a sentence,  
196 while the transformed text using cTAKES maps similar terms to a single CUI thus negating  
197 some variability due to individual clinician vocabulary and word choice.

198

#### 199 Statistical Analysis

200 Models were compared along multiple metrics with the primary being Area Under the Precision  
201 Recall Curve (AU\_PRC). The AU\_PRC considers both precision (positive predictive value) and  
202 recall (sensitivity) and was chosen as the primary metric given the importance of identifying all  
203 positive cases and better accounting for imbalanced datasets. We also considered other metrics  
204 such as accuracy, F1 score, area under the receiver operator curve (AU\_ROC), and language  
205 model complexity as determined by the number of parameters. We evaluated the number of  
206 parameters (i.e., model weights) for language models since a higher number of parameters can  
207 represent a need for more significant computational resources. We selected our final model as  
208 the one with the most favorable metrics, prioritizing AU\_PRC. In the case of similarly performing  
209 models, parsimony was prioritized. We also compared model performance against clinical  
210 detection of opioid misuse ICD-10-CM diagnosis codes.<sup>26,27</sup> Entry of ICD-10-CM codes  
211 represent clinician identification of opioid misuse. ICD-10-CM codes are commonly used for  
212 problem list generation, billing, surveillance, and research. They represent a baseline that any  
213 potential classification model should outperform. As a binary variable, we only determined a  
214 subset of metrics for ICD-10-CM code performance: precision, recall, F1 score, and accuracy.

215

#### 216 Feature/Variable Importance

217 To evaluate face validity of the final model, we estimated feature importance for the best-  
218 performing model on the held-out test set. Given the black box nature of many neural methods,  
219 we used Local Interpretable Model-agnostic Explanations (LIME) to evaluate the top 25 features

220 which were most predictive of opioid misuse.<sup>28</sup> Designed for explainable artificial intelligence,  
221 the LIME algorithm fits multiple surrogate linear regression models to approximate a machine  
222 learning model and evaluates feature importance for each prediction in the form of beta  
223 coefficients, referred to as LIME scores. We used LIME to evaluate the features which predicted  
224 whether a patient was positive or negative for opioid misuse for each observation in the held-out  
225 test set.

226

227 All analyses were performed in Python (version 3.12) using PyTorch (version 2.4).<sup>29</sup> This study  
228 was reviewed and exempted from review as non-human subjects research by the institutional  
229 review board of the primary institution. The study conforms, where appropriate, to Transparent  
230 Reporting of a multivariable prediction model for Individual Prognosis Or Diagnosis + Artificial  
231 Intelligence (TRIPOD+AI) guidelines (Appendix A).<sup>30</sup>

232

### 233 Results

234 Of the initial 1200 annotated ED encounters comprising the study cohort, 77 encounters were  
235 removed for enhanced privacy protections associated with patient chart (62) or lack of any text  
236 documentation (15), leaving 1123 encounters for training, validation, and testing. Of the total  
237 1123 cases, 570 were labeled as opioid misuse positive and 553 labeled negative.

238 Demographic and other information for the cohort is shown in Table 1. Encounters were divided  
239 temporally into training, validation, and testing sets with 786, 168, and 169 encounters,  
240 respectively. In the test set, there were 75 encounters labeled positive for opioid misuse and 94  
241 labeled negative.

242

243 Table 1. Demographics of Cohort

| Variable | n (%) |
|----------|-------|
|----------|-------|

|                    |              |
|--------------------|--------------|
| Age                |              |
| 18-34              | 285 (25.38%) |
| 35-49              | 255 (22.71%) |
| 50-64              | 360 (32.06%) |
| 65+                | 223 (19.86%) |
| Sex                |              |
| Female             | 543 (48.35%) |
| Male               | 580 (51.65%) |
| Race/Ethnicity     |              |
| Non-Hispanic Black | 636 (56.63%) |
| Hispanic or Latino | 294 (26.18%) |
| Non-Hispanic White | 159 (14.16%) |
| Other              | 25 (2.23%)   |
| Patient Declined   | 9 (0.80%)    |
| Insurance          |              |
| Medicaid           | 665 (59.22%) |
| Medicare           | 245 (21.82%) |
| Private            | 130 (11.58%) |
| Other              | 18 (1.60%)   |
| No Information     | 65 (5.79%)   |
| ED Disposition     |              |
| AMA                | 77 (6.9%)    |
| Admit              | 487 (43.4%)  |
| Discharge          | 417 (37.13%) |
| Expired            | 2 (0.18%)    |

|                        |            |
|------------------------|------------|
| Observation            | 59 (5.25%) |
| Sent to operating room | 2 (0.18%)  |
| Other                  | 79 (7.0%)  |

244 Notes: ED, Emergency Department; LWBS, left without being seen by medical provider; AMA,  
245 left against medical advice, eloped, or left without being seen by provider. “Other” disposition  
246 category includes transfers to other facilities, transfers to behavioral health, transfers to  
247 obstetrics, and unspecified dispositions.

248

249 Of the classic machine learning methods, XGBoost had the highest AU-PRC (0.936), accuracy  
250 (0.8876), and F1 score (0.8633) on the held-out test set (Table 2). Logistic regression, support  
251 vector machine, and XGBoost-based models all had higher AU\_PRC when used with CUIs,  
252 while only decision tree models had improved metrics with untransformed text. Of the classic  
253 machine learning methods, only XGBoost models outperformed ICD-10-CM codes in recall, F1  
254 score, and accuracy.

255

256 With the exception of XGBoost, the neural classifiers utilizing pre-trained language models  
257 generally outperformed the classic machine learning methods in AU\_PRC. The best performing  
258 models were the SMART-AI based models which used CUIs as inputs. The SMART-AI model  
259 that underwent transfer learning with domain adaptation through fine tuning with frozen CUI  
260 embeddings had the highest AU\_PRC and AU\_ROC of all models evaluated.

261

262 Table 2: results of classifiers by method and data preparation

263

| Method    | Data | Precision* | Recall* | F1*    | Accuracy* | AU_ROC | AU_PRC |
|-----------|------|------------|---------|--------|-----------|--------|--------|
| ICD Codes | ICD  | 0.9643     | 0.7297  | 0.8308 | 0.8698    | -      | -      |

|                        |       |        |        |        |        |        |        |
|------------------------|-------|--------|--------|--------|--------|--------|--------|
|                        | Codes |        |        |        |        |        |        |
| Logistic Regression    | CUIs  | 0.831  | 0.7867 | 0.8082 | 0.8343 | 0.8831 | 0.9036 |
| Logistic Regression    | Text  | 0.7763 | 0.7867 | 0.7815 | 0.8047 | 0.8955 | 0.8786 |
| Support Vector Machine | CUIs  | 0.8551 | 0.7867 | 0.8194 | 0.8462 | 0.9055 | 0.908  |
| Support Vector Machine | Text  | 0.6988 | 0.7733 | 0.7342 | 0.7515 | 0.8383 | 0.8088 |
| Decision Tree          | CUIs  | 0.8133 | 0.8133 | 0.8133 | 0.8343 | 0.8322 | 0.8548 |
| Decision Tree          | Text  | 0.8101 | 0.8533 | 0.8312 | 0.8462 | 0.8469 | 0.8643 |
| XGBoost                | CUIs  | 0.9375 | 0.8    | 0.8633 | 0.8876 | 0.9268 | 0.936  |
| XGBoost                | Text  | 0.9016 | 0.7333 | 0.8088 | 0.8462 | 0.9356 | 0.9336 |
| BERT                   | Text  | 0.8333 | 0.6667 | 0.7407 | 0.7929 | 0.9094 | 0.9101 |
| BioBERT                | Text  | 0.7465 | 0.7067 | 0.726  | 0.7633 | 0.8465 | 0.8182 |
| Longformer             | Text  | 0.9667 | 0.7733 | 0.8593 | 0.8876 | 0.8738 | 0.9087 |
| Clinical Longformer    | Text  | 0.9231 | 0.8    | 0.8571 | 0.8817 | 0.8894 | 0.9164 |
| Clinical Bigbird       | Text  | 0.9104 | 0.8133 | 0.8592 | 0.8817 | 0.918  | 0.9329 |
| SMART-AI               | CUIs  | 1      | 0.64   | 0.7805 | 0.8402 | 0.8753 | 0.8934 |
| SMART-AI as Feature    | CUIs  | 0.9828 | 0.76   | 0.8571 | 0.8876 | 0.939  | 0.9419 |

| Extractor**  |      |        |      |        |        |        |               |
|--------------|------|--------|------|--------|--------|--------|---------------|
| SMART-AI     | CUIs | 0.9661 | 0.76 | 0.8507 | 0.8817 | 0.9464 | <b>0.9476</b> |
| Finetuned*** |      |        |      |        |        |        |               |

264 \* Threshold for classification is  $P(\text{Opioid}) \geq 0.5$  for all classifiers except SMART-AI base variant  
265 (for which use their recommended 0.05)

266 \*\* Only the linear layers were trained, leaving the rest of the model frozen

267 \*\*\* All parameters were fine-tuned apart from frozen CUI embeddings

268

269 We considered model complexity as well, and we present those findings in Table 3. The

270 SMART-AI based models had fewer parameters than all pretrained language models.

271 Explainability analyses using LIME show the CUIs more predictive of opioid misuse were

272 'heroin', 'opioids', 'alcoholic intoxication, chronic', 'cocaine', 'opiates', and 'suboxone' (Figure 1).

273

274 Table 3: Neural Classifier Parameters

| Model                         | Data | No. of Parameters |
|-------------------------------|------|-------------------|
| BERT                          | Text | 109 M             |
| BioBERT                       | Text | 108 M             |
| Longformer                    | Text | 148 M             |
| Clinical Longformer           | Text | 148 M             |
| Clinical Bigbird              | Text | 127 M             |
| SMART-AI                      | CUI  | 12.15 M           |
| SMART-AI as Feature Extractor | CUI  | 12.4 M            |
| SMART-AI Finetuned            | CUI  | 12.4 M            |

275

276 Figure 1: Feature Importance for predicting opioid misuse

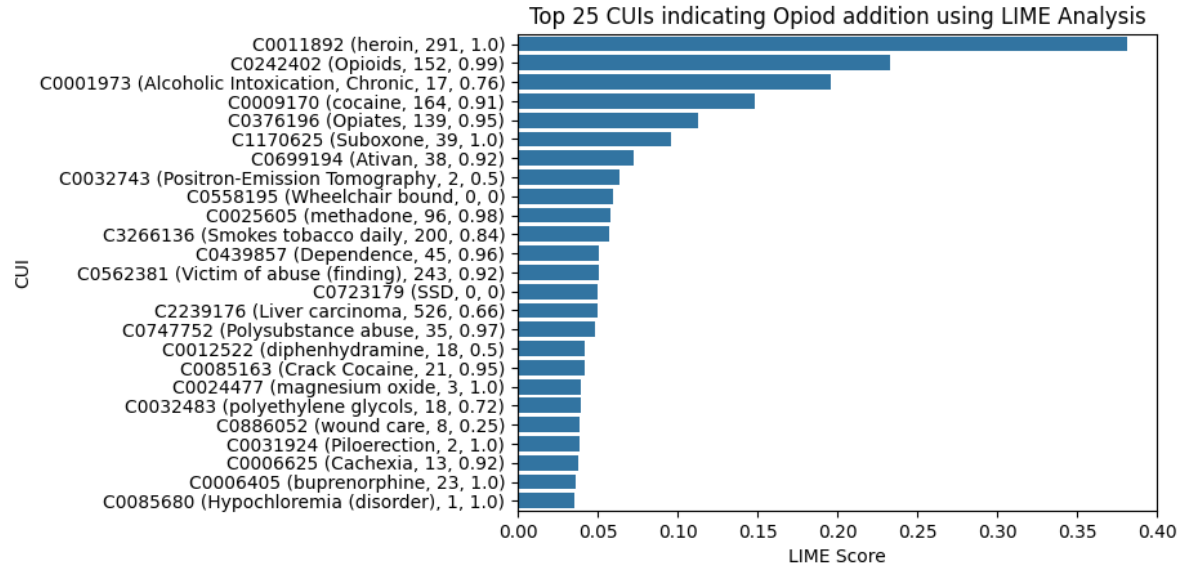

277

278 \*Descriptions along the y-axis are of the following format: concept unique identifier (text  
279 descriptions from the National Library of Medicine's Unified Medical Language System, number  
280 of encounters from the training set with the concept unique identifier, proportion of encounters  
281 with the concept unique identifier that was labeled as displaying opioid misuse). LIME scores  
282 range from 0-1 with higher scores indicating higher predictive power on the test set.

283

284

285 Discussion

286 In this evaluation of model-based detection of patient encounters with opioid misuse in the ED  
287 setting, the best performing NLP classifiers outperformed ICD-10-CM codes for the detection of  
288 opioid misuse. The best performance was noted from the models which were trained for the  
289 detection of opioid misuse in hospitalized patients and adapted to this domain by employing  
290 transfer learning techniques. These models were also more lightweight, based on the number of  
291 parameters, than those using pretrained language models. In general, models based on text  
292 transformed to a standard UMLS lexicon performed as well or better than those using raw text in  
293 comparable settings. Some of the pretrained language models, especially Clinical Bigbird, had

294 comparable performance, most likely due to its large context window and pretraining on medical  
295 text (MIMIC-III clinical notes).<sup>23</sup> It is important to note that XGBoost, a lightweight classifier,  
296 stood out among classical machine learning methods by delivering comparable performance to  
297 neural approaches without necessarily requiring text pre-processing with cTAKES.

298

299 Model-based detection of patients with opioid misuse has implications in healthcare delivery,  
300 disease surveillance, and research. The accurate detection of patients likely to benefit from  
301 opioid-specific interventions is critical in the ED setting. Universal manual screening is  
302 infrequently performed due to being resource intensive and because it may not be ideally suited  
303 for the emergency setting where there are multiple competing clinical concerns in a highly time-  
304 sensitive environment.<sup>9</sup> Diagnosis code entry, which serves as a surrogate marker for the  
305 detection of opioid misuse, is highly insensitive.<sup>10,31,32</sup> Current methods of patient detection  
306 would leave many patients that would likely benefit from medical treatment for opioid use  
307 disorder without being detected. As medical treatment is already uncommon among patients  
308 with opioid misuse in the ED, improved detection is critical.<sup>33</sup> Similarly, surveillance for opioid  
309 misuse among ED patients has implications for resource allocation and programmatic funding.  
310 Underdetection leaves already resource-strapped environments with a diminished ability to  
311 advocate for expanded resources necessary to care for patients with opioid use disorder. As  
312 ICD-10-CM codes are highly relied upon for cohort development in research, the improved  
313 detection with NLP-based models would allow for decreased selection bias and improved  
314 validity of research reliant on diagnosis codes for cohort discovery.

315

316 In the current study, we evaluated both the use of raw text and transformed text as features for  
317 candidate models. Both have theoretical benefits and drawbacks. Raw text, when used with pre-  
318 trained transformer-based models, has the benefit of context from surrounding words to improve  
319 classification. It also avoids an additional layer of computational burden that occurs with text



320 pre-processing. In our analysis, we evaluated transformed text to a standardized lexicon from  
321 UMLS using cTAKES. Although context is lost by using cTAKES as it transforms named entities  
322 without regard for nearby terms, advantages of using cTAKES are that it has the ability to: 1)  
323 map disparate terminology to single distinct concepts; and 2) remove identifying protected  
324 health information (PHI) such as names and dates. The benefits of mapping to CUIs negate  
325 some of the effects of individual variations in vocabulary, allowing similar concepts to be  
326 aggregated. The removal of PHI carries implications for model deployment as multiple  
327 institutions can theoretically share lists of deidentified CUIs from clinical encounters for model  
328 processing, allowing for the accurate surveillance for disease processes by public health entities  
329 across multiple institutions without compromising patient privacy.

330

331 Among similarly performing models, the simpler model is preferred due to explainability,  
332 scalability, and transportability. Pretrained language models, while computationally expensive,  
333 did not outperform the SMART-AI classifier, which has fewer parameters by an order of  
334 magnitude. In addition, the baseline SMART-AI classifier without adaptations was outperformed  
335 by a version fine-tuned on ED-specific data, which speaks to the successful adaptation to this  
336 domain using transfer learning from external sources. Note that most of the SMART-AI  
337 parameters (approximately 11.2M) were pre-trained CUI embeddings. Evaluation of black-box  
338 neural network-based clinical models for interpretability is an important consideration prior to  
339 clinical deployment. The domain-adapted SMART-AI model underwent evaluation for  
340 interpretability with the most important CUIs in predicting opioid misuse representing concepts  
341 with high face validity. Some terms with decreased association with opioid misuse, such as  
342 'Positron Emission Tomography,' are likely related to features noted in sparse training data for  
343 either the original or adapted classifier or a result of term overlap where some strings may be  
344 mapped to incorrect concepts. The next steps before clinical use of a domain-adapted SMART-  
345 AI model involve subgroup validation and recalibration on a larger cohort of ED encounters.

346

347 All experimental results should be interpreted within the context of their limitations. As ICD-10-  
348 CM codes were a portion of the criteria for cohort development, performance metrics for ICD-  
349 10-CM codes were likely inflated. For experiments with pretrained language models, we were  
350 limited by the context window limitations of the individual models. Preprocessing of text with  
351 cTAKES requires a license and carries the potential limitation of mapping of named entities to  
352 incorrect CUIs. All models designed for clinical use should undergo bias and fairness  
353 assessments to ensure equity. Bias assessments for the current study were unrevealing owing  
354 to the small test set size and should be evaluated on a larger sample with appropriate mitigation  
355 techniques prior to clinical deployment.

356

357 Conclusion

358 Natural language processing-based models can outperform entry of ICD-10-CM diagnosis  
359 codes in the detection of encounters with opioid misuse in the ED setting. Fine tuning with  
360 domain adaptation for pre-trained language models resulted in improved performance of our  
361 opioid misuse classifier.

362

363

364 References

365

366 1. Abuse NI on D. Drug Overdose Death Rates | National Institute on Drug Abuse (NIDA)

367 [Internet]. 2024 [cited 2024 Aug 5];Available from: [https://nida.nih.gov/research-](https://nida.nih.gov/research-topics/trends-statistics/overdose-death-rates)

368 [topics/trends-statistics/overdose-death-rates](https://nida.nih.gov/research-topics/trends-statistics/overdose-death-rates)

369 2. D’Onofrio G, McCormack RP, Hawk K. Emergency Departments - A 24/7/365 Option for

370 Combating the Opioid Crisis. *N Engl J Med* 2018;379(26):2487–90.

371 3. Dowell D, Brown S, Gyawali S, et al. Treatment for Opioid Use Disorder: Population

372 Estimates — United States, 2022. *Morb Mortal Wkly Rep* 2024;73(25):567–74.

373 4. Shastry S, Manini AF, Richardson LD, Lin MP. US ED Opioid-Related Visits Increase, While

374 Use of Medication for Opioid Use Disorder Undetectable, 2011-2016. *J Gen Intern Med*

375 2020;35(3):965–6.

376 5. Chalmers CE, Mullinax S, Brennan J, Vilke GM, Oliveto AH, Wilson MP. Screening Tools

377 Validated in the Outpatient Pain Management Setting Poorly Predict Opioid Misuse in the

378 Emergency Department: A Pilot Study. *J Emerg Med* 2019;56(6):601–10.

379 6. Abuse NI on D. Summary of Misuse of Prescription Drugs [Internet]. *Natl. Inst. Drug Abuse.*

380 -- [cited 2023 Jan 30];Available from: [https://nida.nih.gov/publications/research-](https://nida.nih.gov/publications/research-reports/misuse-prescription-drugs/overview)

381 [reports/misuse-prescription-drugs/overview](https://nida.nih.gov/publications/research-reports/misuse-prescription-drugs/overview)

382 7. Commonly Used Terms | Opioids | CDC [Internet]. 2023 [cited 2023 Oct 5];Available from:

383 <https://www.cdc.gov/opioids/basics/terms.html>

384 8. 2015 National Survey on Drug Use and Health: Methodological Summary and Definitions |

385 CBHSQ Data [Internet]. [cited 2023 Jan 30];Available from:

- 386 <https://www.samhsa.gov/data/report/2015-national-survey-drug-use-and-health->  
387 [methodological-summary-and-definitions](https://www.samhsa.gov/data/report/2015-national-survey-drug-use-and-health-methodological-summary-and-definitions)
- 388 9. Chhabra N. Death by a Thousand Screens: A Practical Role for Machine Learning in  
389 Emergency Medicine. *Ann Emerg Med* 2023;82(4):531–2.
- 390 10. Chhabra N, Smith D, Pachwicz P, et al. Performance of International Classification of  
391 Disease-10 codes in detecting emergency department patients with opioid misuse. *Addict*  
392 *Abingdon Engl* 2023;
- 393 11. Sharma B, Dligach D, Swope K, et al. Publicly available machine learning models for  
394 identifying opioid misuse from the clinical notes of hospitalized patients. *BMC Med Inform*  
395 *Decis Mak [Internet]* 2020 [cited 2021 Jan 17];20. Available from:  
396 <https://www.ncbi.nlm.nih.gov/pmc/articles/PMC7191715/>
- 397 12. Afshar M, Sharma B, Bhalla S, et al. External validation of an opioid misuse machine  
398 learning classifier in hospitalized adult patients. *Addict Sci Clin Pract* 2021;16(1):19.
- 399 13. Afshar M, Sharma B, Dligach D, et al. Development and multimodal validation of a  
400 substance misuse algorithm for referral to treatment using artificial intelligence (SMART-AI):  
401 a retrospective deep learning study. *Lancet Digit Health* 2022;4(6):e426–35.
- 402 14. Anthony K. Cook County closes 2020 with record highs of 875 gun-related homicides, 1,599  
403 opioid deaths [Internet]. *Chic. Sun-Times*. 2021 [cited 2021 Jan 26]; Available from:  
404 [https://chicago.suntimes.com/metro-state/2021/1/2/22210281/cook-county-homicide-total-](https://chicago.suntimes.com/metro-state/2021/1/2/22210281/cook-county-homicide-total-2020-970-opioid-covid)  
405 [2020-970-opioid-covid](https://chicago.suntimes.com/metro-state/2021/1/2/22210281/cook-county-homicide-total-2020-970-opioid-covid)
- 406 15. •. As Opioid Overdose Deaths Hit New Record, Pressure Grows for Safe Places to Inject  
407 Drugs in Chicago [Internet]. *NBC Chic*. 2022 [cited 2024 Oct 23]; Available from:

- 408 [https://www.nbcchicago.com/news/local/as-opioid-overdose-deaths-hit-new-record-](https://www.nbcchicago.com/news/local/as-opioid-overdose-deaths-hit-new-record-pressure-grows-for-safe-places-to-inject-drugs-in-chicago/2730602/)  
409 [pressure-grows-for-safe-places-to-inject-drugs-in-chicago/2730602/](https://www.nbcchicago.com/news/local/as-opioid-overdose-deaths-hit-new-record-pressure-grows-for-safe-places-to-inject-drugs-in-chicago/2730602/)
- 410 16. Afshar M, Joyce C, Dligach D, et al. Subtypes in patients with opioid misuse: A prognostic  
411 enrichment strategy using electronic health record data in hospitalized patients. PloS One  
412 2019;14(7):e0219717.
- 413 17. Harris PA, Taylor R, Thielke R, Payne J, Gonzalez N, Conde JG. Research electronic data  
414 capture (REDCap)--a metadata-driven methodology and workflow process for providing  
415 translational research informatics support. J Biomed Inform 2009;42(2):377–81.
- 416 18. Harris PA, Taylor R, Minor BL, et al. The REDCap consortium: Building an international  
417 community of software platform partners. J Biomed Inform 2019;95:103208.
- 418 19. Dligach D, Afshar M, Miller T. Pre-training phenotyping classifiers. J Biomed Inform  
419 2021;113:103626.
- 420 20. Devlin J, Chang M-W, Lee K, Toutanova K. BERT: Pre-training of Deep Bidirectional  
421 Transformers for Language Understanding [Internet]. 2019 [cited 2023 Jun 8];Available  
422 from: <http://arxiv.org/abs/1810.04805>
- 423 21. Beltagy I, Peters ME, Cohan A. Longformer: The Long-Document Transformer [Internet].  
424 2020 [cited 2024 Oct 30];Available from: <http://arxiv.org/abs/2004.05150>
- 425 22. Lee J, Yoon W, Kim S, et al. BioBERT: a pre-trained biomedical language representation  
426 model for biomedical text mining [Internet]. 2019 [cited 2024 Oct 30];Available from:  
427 <http://arxiv.org/abs/1901.08746>

- 428 23. Li Y, Wehbe RM, Ahmad FS, Wang H, Luo Y. Clinical-Longformer and Clinical-BigBird:  
429 Transformers for long clinical sequences [Internet]. 2022 [cited 2024 Oct 30];Available from:  
430 <http://arxiv.org/abs/2201.11838>
- 431 24. Savova GK, Masanz JJ, Ogren PV, et al. Mayo clinical Text Analysis and Knowledge  
432 Extraction System (cTAKES): architecture, component evaluation and applications. J Am  
433 Med Inform Assoc JAMIA 2010;17(5):507–13.
- 434 25. Reátegui R, Ratté S. Comparison of MetaMap and cTAKES for entity extraction in clinical  
435 notes. BMC Med Inform Decis Mak 2018;18(Suppl 3):74.
- 436 26. Slavova S, Quesinberry D, Costich JF, et al. ICD-10-CM-Based Definitions for Emergency  
437 Department Opioid Poisoning Surveillance: Electronic Health Record Case Confirmation  
438 Study. Public Health Rep Wash DC 1974 2020;135(2):262–9.
- 439 27. Weiss AJ, McDermott KW, Heslin KC. Table 1, ICD-10-CM diagnosis codes defining  
440 different opioid-related conditions [Internet]. 2019 [cited 2021 Jan 18];Available from:  
441 <http://www.ncbi.nlm.nih.gov/books/NBK538344/table/sb247.tab1/>
- 442 28. Ribeiro MT, Singh S, Guestrin C. “Why Should I Trust You?”: Explaining the Predictions of  
443 Any Classifier [Internet]. 2016 [cited 2024 Oct 31];Available from:  
444 <http://arxiv.org/abs/1602.04938>
- 445 29. Paszke A, Gross S, Massa F, et al. PyTorch: An Imperative Style, High-Performance Deep  
446 Learning Library [Internet]. 2019 [cited 2024 Oct 31];Available from:  
447 <http://arxiv.org/abs/1912.01703>

- 448 30. Collins GS, Moons KGM, Dhiman P, et al. TRIPOD+AI statement: updated guidance for  
449 reporting clinical prediction models that use regression or machine learning methods. *BMJ*  
450 2024;385:e078378.
- 451 31. Slavova S, Quesinberry D, Costich JF, et al. ICD-10-CM-Based Definitions for Emergency  
452 Department Opioid Poisoning Surveillance: Electronic Health Record Case Confirmation  
453 Study. *Public Health Rep Wash DC* 1974 2020;135(2):262–9.
- 454 32. Ranapurwala SI, Alam IZ, Pence BW, et al. Development and validation of an electronic  
455 health records-based opioid use disorder algorithm by expert clinical adjudication among  
456 patients with prescribed opioids. *Pharmacoepidemiol Drug Saf* 2023;32(5):577–85.
- 457 33. Chhabra N, Smith D, Dickinson G, et al. Trends and Disparities in Initiation of  
458 Buprenorphine in US Emergency Departments, 2013-2022. *JAMA Netw Open*  
459 2024;7(9):e2435603.

460
